# Supplementary material for: Nucleotide Pool Depletion Induces G-Quadruplex-Dependent Perturbation of Gene Expression
Source: PubMed Central journal article supplement — Cell Rep. 2015 Dec 10;13(11):2491–503. doi: 10.1016/j.celrep.2015.11.039 (PMC4695339; doi:10.1016/j.celrep.2015.11.039), 2015-12-10
Supplement: mmc1.pdf [file mmc1.pdf]

Cell Reports

Supplemental Information

# **Nucleotide Pool Depletion Induces G-Quadruplex-Dependent Perturbation of Gene Expression**

**Charikleia Papadopoulou, Guillaume Guilbaud, Davide Schiavone, and Julian E. Sale**

**Figure S1 (Related to Figure 1)**

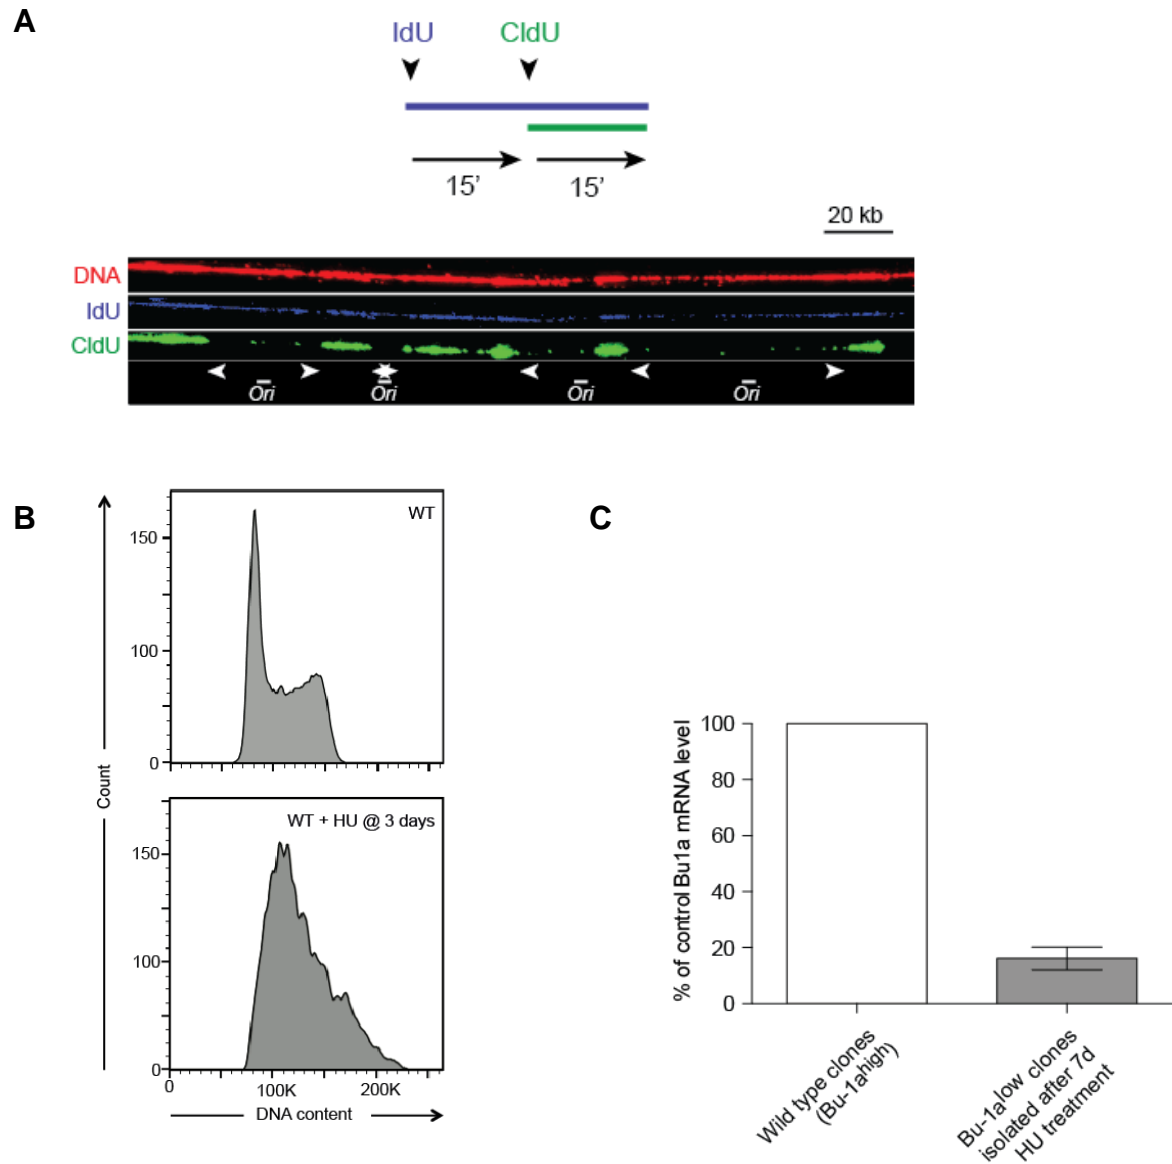

**Figure S1.** A. Scheme for revealing replication tracts in combed DNA fibres. Cells were labelled with IdU for 15 minutes and then with CldU for a further 15 minutes before being lysed and the DNA combed on glass slides. The labelled tracts of DNA were revealed in blue for IdU and in green for CldU. The DNA itself is stained red. B. Cell cycle profile of unperturbed wild type DT40 cells (upper panel) and after 3 days in 150  $\mu$ M HU (lower panel). C. qPCR for Bu-1a transcript in five Bu-1a<sup>low</sup> clones isolated after 7 days culture in 150  $\mu$ M HU. The transcript level for each clone was normalised to that in bulk untreated wild type cells. Error bar = 1SD.

**Figure S2 (related to Figure 2)**

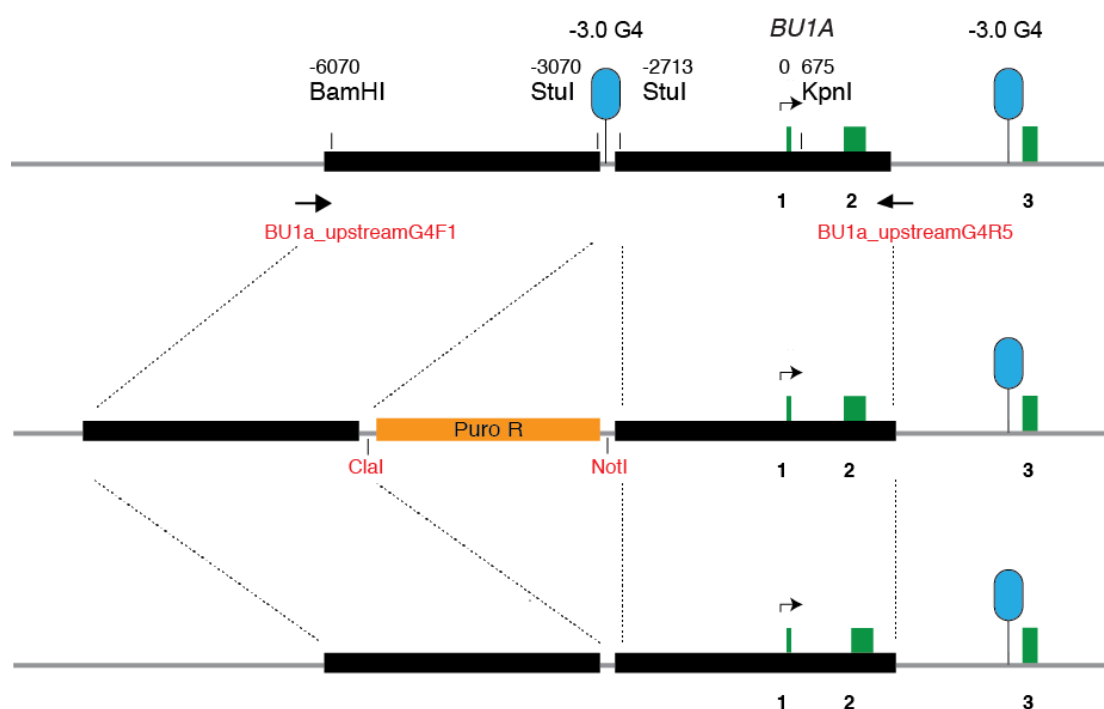

**Figure S2. Scheme for deletion of the -3.0 G4 motif.** A genomic region either side of the -3.0 G4 motif was amplified with primers Bu1aupstreamG4F1 and Bu1aupstreamG4R5 (Table S3) and cloned into pBluescript vector as a KpnI - BamHI fragment. The -3.0 G4 motif was removed by cutting the endogenous StuI sites, which releases the motif, and replacing it with a linker containing the restriction sites ClaI and NotI. Finally, a selection cassette, flanked by loxP sites and conferring resistance to either puromycin or blasticidin was inserted as a ClaI - NotI fragment. Following transfection and drug selection, screening for successful targeting was performed with PCR using primers Bu1ascreenF1 (amplifying upstream the 5' prime arm of the construct) and Bu1ascreenR6 (at the start of the puromycin selection cassette) or Bu1ascreenR1 (at the start of the blasticidin selection cassette) (Table S3). The selection cassettes were then removed by transient expression of Cre recombinase.

**Figure S3 (Related to Figure 3)**

**A**

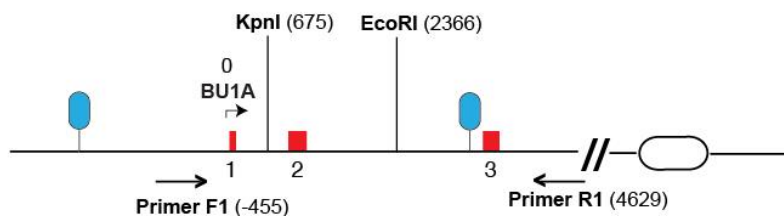

**B**

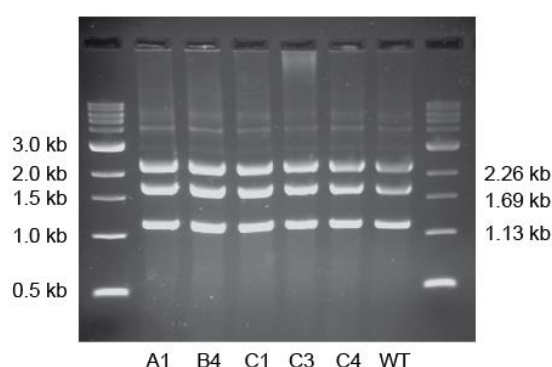

**C**

|    |                                                                          |
|----|--------------------------------------------------------------------------|
| WT | AGAGCTTAGCGAACAAGGAAAATAAAGAGGTGCCATGGGCTGGGTGGGTGCTGTCAAGGGCTGGGATCTAGC |
| A1 | AGAGCTTAGCGAACAAGGAAAATAAAGAGGTGCCATGGGCTGGGTGGGTGCTGTCAAGGGCTGGGATCTAGC |
| B4 | AGAGCTTAGCGAACAAGGAAAATAAAGAGGTGCCATGGGCTGGGTGGGTGCTGTCAAGGGCTGGGATCTAGC |
| C1 | AGAGCTTAGCGAACAAGGAAAATAAAGAGGTGCCATGGGCTGGGTGGGTGCTGTCAAGGGCTGGGATCTAGC |
| C3 | AGAGCTTAGCGAACAAGGAAAATAAAGAGGTGCCATGGGCTGGGTGGGTGCTGTCAAGGGCTGGGATCTAGC |
| C4 | AGAGCTTAGCGAACAAGGAAAATAAAGAGGTGCCATGGGCTGGGTGGGTGCTGTCAAGGGCTGGGATCTAGC |

**Figure S3. No evidence of genetic instability in the *BU-1* locus of HU-treated Bu-1a<sup>low</sup> clones.** A. Scheme of PCR and restriction digest of the *BU-1* locus to detect gross deletions. Primers F1 and R1 = Bu-1aG4seq\_Foward and Reverse (Table S4). B. Results of PCR and restriction digestion for wild type cells and five Bu-1a<sup>low</sup> clones. C. Sequence around the +3.5 G4 motif in these clones. The G4 motif is highlighted in red.

**Figure S4 (related to Figure 3)**

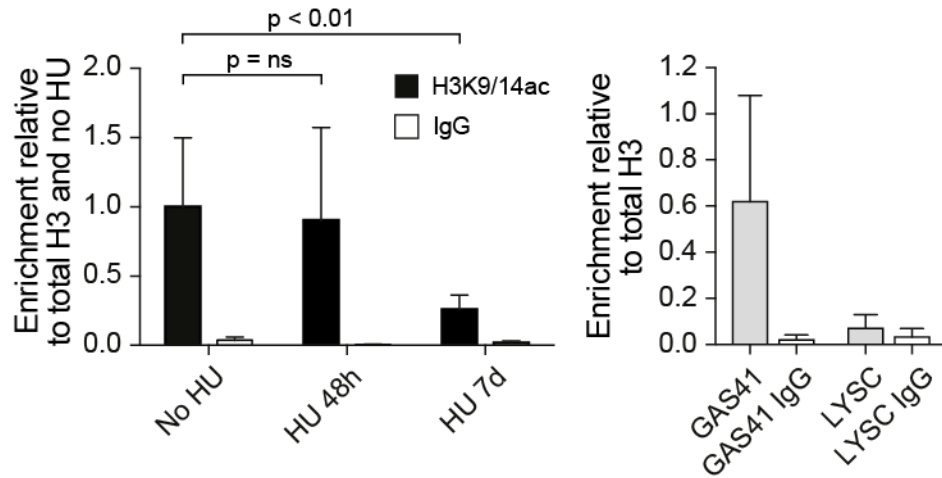

**Figure S4. Loss of H3K9/14 acetylation at the *BU-1* promoter following treatment with HU.** H3K9/14ac at the *BU-1* promoter in untreated wild type cells and cells treated with 150  $\mu$ M for 48 hours and for 7 days. The enrichment for each mark is normalised to total H3 and then to the untreated level. The enrichment with non-specific IgG is shown as a control. Positive and negative controls for each mark are shown with ChIP at a constitutively active locus, GAS41 and a heterochromatinised locus, LYSC. Error bars show 1 standard deviation for three independent IPs.

**Figure S5 (related to Figure 4)**

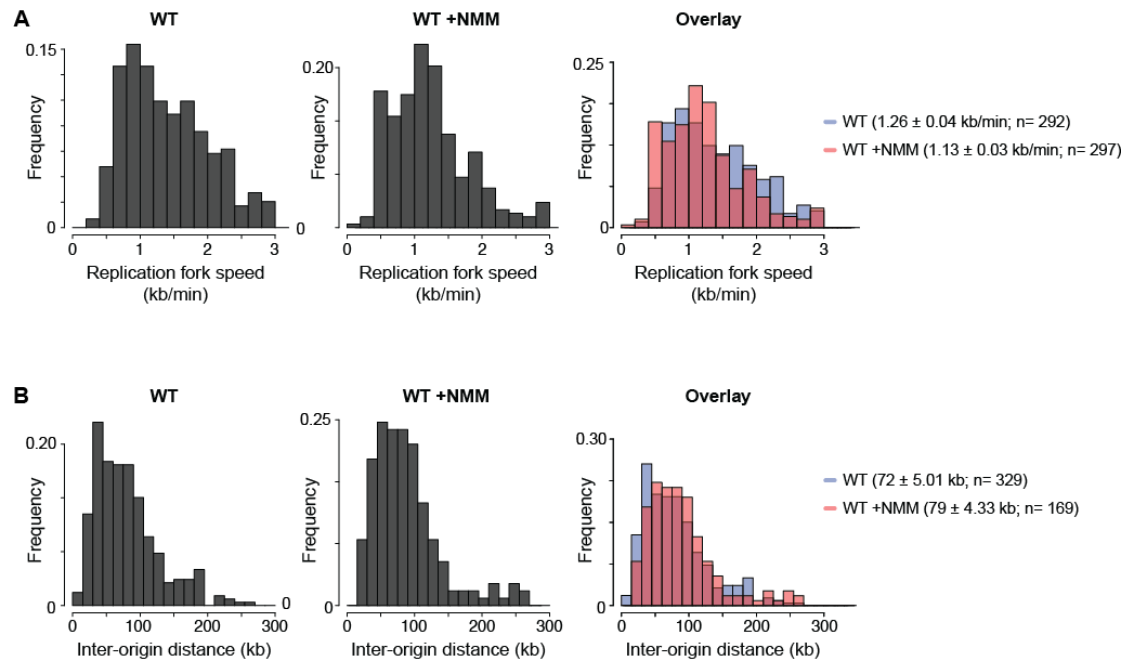

**Figure S5. Replication dynamics in cells treated with NMM.** A. Replication fork rates in cells treated with NMM. B. Inter-origin distances in cells treated with NMM. The comparator wild type dataset in both cases is that shown in Figure 1B.

**Figure S6 (related to Figure 6)**

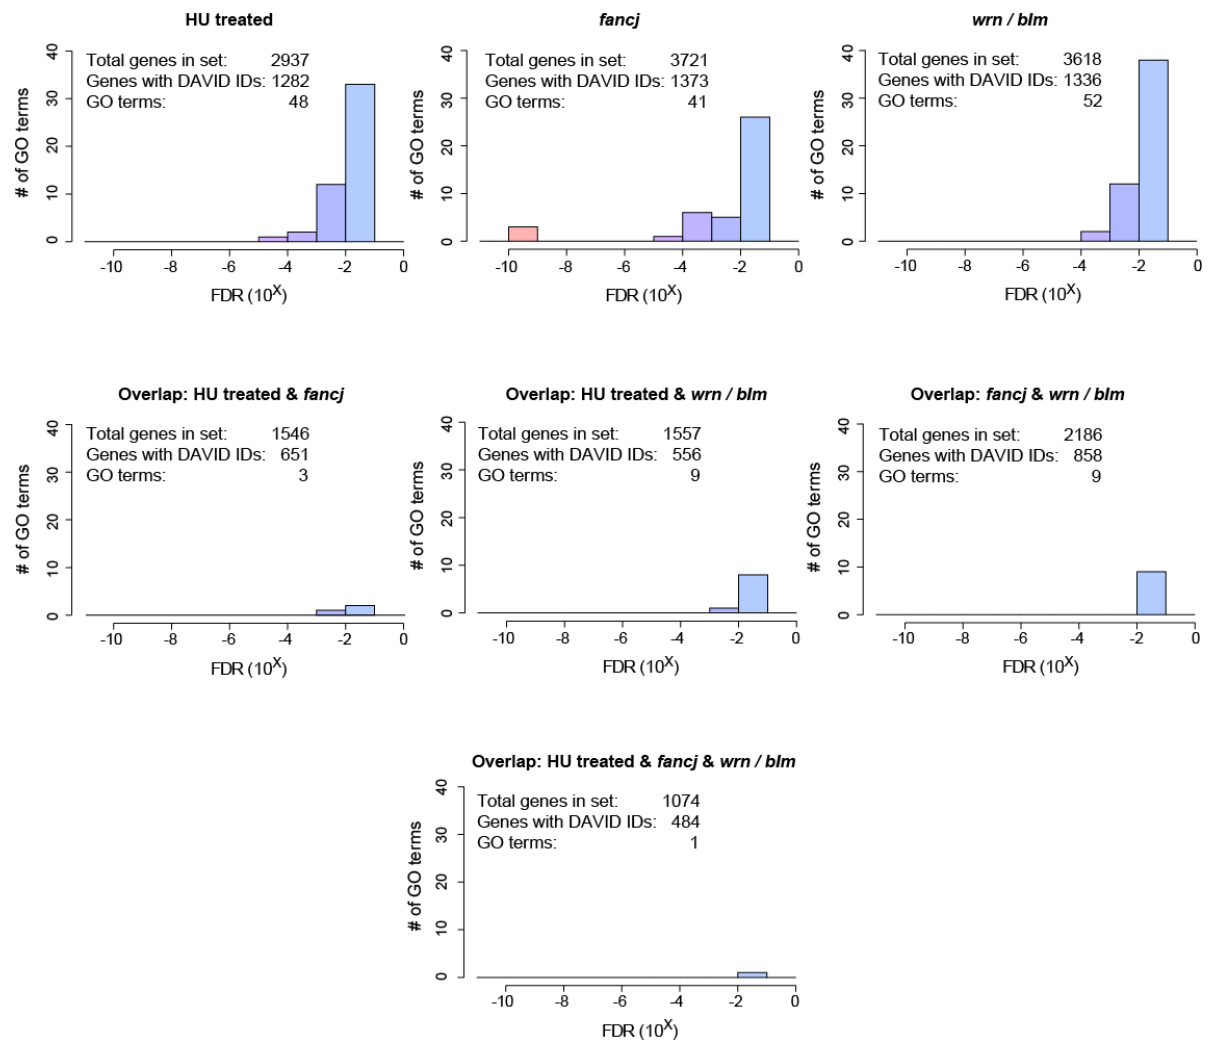

**Figure S5. Analysis of dysregulated genes in HU-treated, *fancj* and *wrn/blm* cells by functional annotation.** The number of functional annotation terms retrieved by DAVID for each gene set. The annotations are grouped by their false discovery rate (FDR) statistic in bin sizes of  $10^{-1}$ . While each individual condition reveals a diverse range of annotations with significant ( $\text{FDR} < 0.05$ ) enrichment, the genes in the intercept of the three conditions is enriched for only one term, N-glycan biosynthesis (Table S2).

**Table S1 (related to Figure 6)**

|                        | Genes with at least one G4 motif within 1 kb upstream of the TSS to the end of the gene (%) | n     |
|------------------------|---------------------------------------------------------------------------------------------|-------|
| Whole array            | 62.64                                                                                       | 12643 |
| Genes not dysregulated | 59.22                                                                                       | 6673  |
| <i>fancj</i>           | 67.91                                                                                       | 3397  |
| <i>wrn/blm</i>         | 67.88                                                                                       | 3225  |
| HU-treated wild type   | 67.75                                                                                       | 2617  |

**Table S1. Association of gene dysregulated in *fancj*, *wrn/blm* and wild type cells treated with HU with G4 motifs.****Table S2 (related to Figure 6)**

A separate Excel workbook listing the functional annotation terms significantly enriched in genes dysregulated in HU-treated, *fancj* and *wrn/blm* cells and the overlap gene sets shown in Figure 6B.

**Table S3**

| Oligonucleotides used for constructs |                                         |
|--------------------------------------|-----------------------------------------|
| Name                                 | Sequence (5' to 3')                     |
| G4BU-1                               | CGCGTGGGCTGGGTGGGTGCTGTCAAGGGCTGGG      |
| G4BU-1MUT                            | CGCGTGGGCTGAGTGGGTGCTGTCAAGAGCTGGG      |
| G4BU-1INV                            | CGCGTCCCAGCCCTTGACAGCACCCACCCAGCCC      |
| G4#1                                 | CGCGTCGATCGTTGGTTTTGGTTTTGGTTTTGGTA     |
| G4#2                                 | CGCGTCGATCGTGGGTTTGGGTTTGGGTTTGGGTA     |
| G4#3                                 | CGCGTCGATCGTGGGTTGGGTTGGGTTGGGTA        |
| G4#4                                 | CGCGTCGATCGTTTTGGGTGGGTGGGTGGTTTTTA     |
| CEB1                                 | GGGGGGAGGGAGGGTGGCCTGCGGAGGTCCCTGGGCTGA |
| CEB1MUT                              | GCGCGGAGTGAGAGTGGCCTGCGGAGGTCCCTGCGCTGA |
| BU1SalF                              | AGCGTCGACCGGTGACGTGC                    |
| BU1NotR                              | AAAAATTTTTAAAAGCGGCCGC                  |
| Bu1aupstreamG4F1                     | CCTGAAGGCCATGTTTGCAC                    |
| Bu1aupstreamG4R5                     | TGCTTGCTTGTCAGATCGCT                    |
| Bu1aupscreenF1                       | TGCCTTTTTCTTTCCCCGTG                    |
| Bu1aupscreenR1                       | AGAGTGAAGCAGAACGTGGG                    |
| Bu1aupscreenR6                       | AGCAACAGATGGAAGGCCTC                    |

**Table S4**

| <b>Oligonucleotides used for ChIP &amp; qPCR</b> |                                   |
|--------------------------------------------------|-----------------------------------|
| <b>Name</b>                                      | <b>Sequence (5' to 3')</b>        |
| LYSCpromF                                        | CCACATTGTATAAGAAATTTGGCAA         |
| LYSCpromR                                        | AAAACGCCTCTTGAGTATACAGAA          |
| GAS41promF                                       | CGTGAACTGCGCGAAGAAG               |
| GAS41promR                                       | CCCCCGCCACCTACCA                  |
| BU1ApromF                                        | CTCTGTAGCCAGATCGTCTTCTC           |
| BU1ApromR                                        | GTGTCAGCTCATCTAGGCAAATC           |
| β actin Forward qPCR                             | TGTCCACCTTCCAGCAGATGT             |
| β actin Reverse qPCR                             | AGTCCGGTTTAGAAGCATTTCG            |
| Bu1a Forward qPCR                                | CTGTTACTGATGGCTCTGCTACC           |
| Bu1a Reverse qPCR                                | CTCCAGTTTCAGACATCTCTTGG           |
| Bu1a Forward                                     | CGGTCGACGTGCAGCTAGACCAGAGTAGGTATT |
| Bu1a Reverse                                     | GGATCGATGGATCTCCATAGACAGATGAGGAC  |
| Bu1a G4seq Forward                               | GGGAATTCAAGGCTGACTCTCCTCTGAAGCTA  |
| Bu1a G4seq Reverse                               | GCGGATCCGGAGCACATCACTAAGTAACCAGAC |

## Supplemental Experimental Procedures

### *Functional annotation analysis of dysregulated gene sets*

A search for functional annotations of the genes within each set (HU-treated, *fancj* and *wrn/blm*) and their overlaps was carried using DAVID Bioinformatics Resources (Huang et al., 2009a; Huang et al., 2009b) without change in default settings. For each mutant, a functional annotation chart of de-regulated genes was been generated. Categories whose false discovery rate (FDR) value was lower than 0.05 were included in the analysis.

## Supplemental References

Huang, W., Sherman, B.T., and Lempicki, R.A. (2009a). Bioinformatics enrichment tools: paths toward the comprehensive functional analysis of large gene lists. *Nucleic Acids Res* 37, 1-13.

Huang, W., Sherman, B.T., and Lempicki, R.A. (2009b). Systematic and integrative analysis of large gene lists using DAVID bioinformatics resources. *Nat Protoc* 4, 44-57.
